# Supplementary material for: Using an electronic activity monitor system as an intervention modality: A systematic review
Source: BMC Public Health. 2015 Jun 24;15:585. doi: 10.1186/s12889-015-1947-3 (PMC4479243; doi:10.1186/s12889-015-1947-3)
Supplement: Additional file 1: — Data abstraction form. This file provides further details of each study included in this review. [file 12889_2015_1947_MOESM1_ESM.xlsx]

## Sheet: data abstraction 
First Author	Barwais	Fitzsimons	Hurling	Pellegrini	Polzien	Reijonsaari	Shuger	Slootmaker	Tabak	Thompson	Thorndike
Year	2013	2013	2007	2010	2006	2012	2011	2009	2014	2014	2012
Journal	Health and Quality of Life Outcomes	Preventive Medicine	Journal of Medical Internet Research	Obesity	Obesity	BMC Public Health	International Journal of Behavioral nutrition and physical activity	Journal of Medical Internet Research	Patient Education and Counseling	Archives of Gerontology and Geriatrics	clinicaltrials.gov
Country	Brisbane, Australia	Glasgow, Scotland	Oxfordshire, UK	Pennsylvania, USA	North Carolina, USA	Finland	South Carolina, USA	Netherlands	Netherlands	Minnesota, USA	Massachusetts, USA
STUDY DESIGN
study aim	evaluate participation in intervention is effective in sedentary but sufficient active adults	1. explore feasibility and pilot an individualized consultation 2. investigate which sedentary behaviors are open to change	evaluate if an Internet and mobile phone based PA program would maintain higher level of PA	evaluate the effectiveness of TECH on weight loss when alone or in combination with behavioral wt loss intervention	examine the efficacy of adding a technology-based intervention to an in person, behavioral weight loss program on weight loss, DI, and PA	effectiveness of a 12-mo intervention on levels of PA, sickness absence and productivity at work	determine effectiveness of continuous self-monitoring and feedback from technology alone or in combination with group weight loss	evaluate feasibility and effectiveness of providing a PAM on daily PA level of young Dutch inactive office workers	investigate how COPD patients respond to motivational cues and whether this response is related to cue- and context characteristics	determine if any activity counseling program and using an accelerometer feedback would result in weight loss, change in % body fat, and biochemistry	test and intervention to increase physical activity of medical residents, and employee population with little time for exercise
Intervention group	online EAM N=18	baseline period with device-- no feedback, given consultation/education on SB and device, asked to change behavior for 2 weeks (1 week with the device)	Internet, email, and mobile phone system. Used the monitoring device for 3 weeks for baseline and 9 weeks for intervention. The system provided feedback and motivation via email and/or text messages, and displayed activity level category, N=47	behavioral lessons weekly (either mailed or in person), monthly telephone calls with counselor for TECH only, received TECH and received feedback. TECH N=17 at randomization N=13 at 6 mo., TECH+SBWL N=17	Include intermittent tech based program (INT-TECH- worn during weeks 1, 5, 9) and continuous tech (CON-TECH worn entire trial time) both wore the device and upload daily (when worn) or paper diaries during "non tech" weeks in INT-TECH. All received SBWP program.	received feedback on baseline fitness and leaflet on PA information/ activity monitoring and distance counseling N=273 at randomization and 264 at 12 mo.	three intervention groups all received weight loss manual. GWL: 14 sessions over 4 months, 6 telephone counseling sessions over the last 5 months N=49 at randomization and N=28 at 9mo. SWA received armband and access to web account N=49 at randomization and N=37 at 9mo. GWL+SWA received both GWL and SWA intervention components N=49 at randomization and N=32 at 9mo	PAM and web-based tailored PAM advice N=51 at randomization, N=48 end of intervention, N=38 at follow up	received activity coach (sensor and smartphone), received feedback for awareness and motivation, also received standard care N=18 at randomization, N=14 at end of trial	N=25 at randomization, N=24 at end. First 6 months received Fitbit with feedback and received counseling (face to face provided every 2 months). Last 6 months, wore Fitbit with feedback, no counseling	given Fitbit activity monitor to wear N=52 at randomization, N=49 at 3 months
Control group	normal daily lifestyle patterns N=15	no comparison group, NOT A RCT	wore the EAM device but did not receive feedback, N=30	standard behavioral weight loss weekly meeting (3 group, 1 individual each month). Encouraged to self monitor DI, PA, and BW. N=17 at randomization, N=9 at 6 mo.	7 in-person individualized counseling sessions (weekly in mo. 1, twice in mo. 2, once in mo. 3)	received feedback on baseline fitness and leaflet on PA information, N=271 at randomization and N=257 at 12 mo.	received self-directed weight loss manual N=50 at randomization, N=26 at mo. 9	single written information brochure with general PA recommendations N=51 at randomization, N=50 end of intervention, N=42 at follow up	received standard care: medication and physiotherapy (group physiotherapy) N=16	N=24. First 6 months wore Fitbit but didn't receive feedback or counseling. Last 6 month wore Fitbit with feedback and counseling	wore a Fitbit monitor but blinded to feedback, N=52 at randomization N=50 at 3 months
Trial length	4 weeks	24 days (about 3 weeks)	3 months	6 months	3 months	12- months	9 months	3 months	1 month	12 months	3 months
Follow up time	none	none	none	none	none	none	none	8 mo. (5 mo. after conclusion of intervention)	none	none	none
STUDY POPULATION
Subjects	sedentary (>7 hours of sitting/day), sufficient PA, 63% office workers	>= 60 y.o.a., community dwelling, need to understand rational of study.	140 recruited from market research recruitment agency, 30-55 y.o.a., 19-30 BMI, no vigorously active, no taking regular prescription, Internet access, mobile phone user, not employed by Unilever, passed the PAR-Q and Rose Angina questionnaire	21-55 y.o.a., 25-40 BMI, sedentary (<60 min/week), computer access. Exclusion: pregnant, taking medications that affect weight or blood pressure, history of disease (diabetes, hear disease, or cancer), physical limitation to do PA, enrolled in weight loss study, >5% loss of current body weight in 6 mo., treated for psychological problems	BMI 25-39.9, 18-55 y.o.a., sedentary (<3 days a week exercising), computer/Internet access, adequate computer skills. Exclusion: specific medical conditions	recruited from Finnish insurance company, recruited from Sep-Nov 2009, eligibility criteria (over 18yoa, employed >=8 hours a week, not scheduled to retire or disability pension, complete health risk appraisal, not pregnant, no cancer or cancer treatment, or any disease that can cause risk to pt.)	recruited from Feb 2008- Feb 2009. 18-64 y.o.a., underactive (<150 mins of MVPA/week), 25-45 BMI, had Internet access. Exclusion: >20 lbs. weight loss in 6 months, hypertensive, ailments that limited PA, serious medical conditions	recruited from 8 worksites surrounding Amsterdam, eligibility criteria (20-40 y.o.a., healthy, ability to walk without aid, Dutch speaking, not pregnant	recruited by a chest physician or nurse practitioner. Participants had COPD, no infection in 4 weeks prior, current or former smoker, able to read/speak Dutch, and internet access. Exclusion: impaired hand function, disease affecting PA, disease influencing bronchial symptoms, need for regular oxygen therapy, history of asthma, less than 6 weeks with physical therapist	sedentary (<30 mins of VPA), >=65 y.o.a., completed Get Up and Go Test in less than 20 s, scoring 4 or greater on Mii-Cog test, 25-40 BMI, waist circumference of 88 (women), 102 (men) or greater. Exclusion: inability to participate in PA, medication treatment for diabetes, hyperlipidemia or thyroid disease, history of MI or angina, terminal illness, cancer, liver disease, or severe osteoporosis	Medicine residents at Massachusetts General Hospital, recruited in the fall of 2010
Sample size (sufficiently powered?)	33, powered at 0.80 with alpha 0.5 and effect size of 0.5	N=24 received intervention, N=22 for analysis, no discussion of power	N=77 at randomization, no discussion of power	N=51 at randomization and N=39 at 6mo, discussion of lack of statistical power	N= 57 at randomization, N=50 at 3 mo. No discussion of power	N=544 at randomization. N=521 at 12 mo. Excluded 9 in intervention group and 14 in control after 12 months. Using 85% power in two-tailed test with alpha=0.05 and standard effect size as 0.27, 253 employees needed in each group	N=197 randomized. Powered to detect 80% power with effect size of 0.81 and alpha 0.0025 (assuming 40% attrition)	N=102 at randomization, N=98 end of intervention, N=80 follow up; effect size of 0.2 for PA level with 80% power and alpha of 0.05, 50 employees needed in each group	N=34 at randomization, N=30 at 3 months. Not statistically powered	N=49 at randomization and N=48 at 12 mo. With effect size of 0.2 in activity with 90% power at alpha =0.05 need 34 subjects in each group. Allowed for 20% attrition with 43 in each group	N=104 at randomization, N=99 at 3 months no discussion of power
Age	27(4)yrs.	mean age of 68	IG: 40.5(7.1) CG: 40.1(7.7)	44.2 (8.7)	41.3(8.7)	CG: 44(10); IG: 43(10)	46.9 (10.8)	total: 31.8(3.5) PAM: 32.5(3.4) Control: 31.2(3.5)- significant difference	IG: 65.2 (9) CG: 67.9 (5.7)	IG: 79.1 (8). CG: 79.8 (6)	29 (0.2)
Race/ethnicity distribution	-	-	99% white	88.2% white, 9.8% African American, 2% other	61.4% white	-	66.8% white, 32.1% Black, 1% other	-	-	-	-
Gender distribution	33% women	42% women	66% women	86.3% women	99% women	CG: 154 (60%) women IG: 180(68%) women	81.7% female	total: 60% women, PAM: 61%, Control: 59%	37% female	81.3% female	53.8% female
Baseline weight	IG: 78.3 (20.6) CG: 84.6 (20.7)	-	IG: 75.1(11.7) CG: 73.9(10.2)	94.3(15.1)	88.8(9.1)	-	92.8(18.4)	77.7(14.6)	-	IG: 75.7(13.4) CG: 81(13.6)	-
Baseline BMI	not measured by investigators, about 27	26.2 (3.7)	IG: 26.2(2.8) CG: 26.5(4.1)	33.7 (3.6)	33.1 (2.8)	25 (4), both groups	33.3 (5.2)	Total: 25.2(4.1) PAM: 25.9(4.5) Control: 24.4(3.5)	IG: 28.4(7.8) CG: 29.2 (4.7)	not reported.	no reported
Baseline PA	measured by IPAQ and SLIPA log IG SB: 10.9(1.9) LPA: 4.3(2.0) walking 568(531.5) MPA: 194(225.3) VPA: 291(495.8) CG SB: 10.7(2.5) LPA: 3.6(1.9) walking 237(299) MPA: 180(207.5) VPA: 173(298.8)	measured by ActivPAL, 8493 steps per day, 51.8(99.5) sedentary hours/week	measured by IPAQ, test group 4350(3200) MET-min, control 3868 (2257) MET-min/week	measured by Paffenbarger PA Questionnaire, 570.6(567.6) kcal/week. Most at SBWL+TECH and least in TECH but not statistically different	no baseline measurements reported; PA measured by Paffenbarger PA questionnaire	measured by reaching ACSM guidelines- minutes of activity per week; Control: 185 (75%) Intervention: 182 (69%)	measured using armband without feedback and estimate of energy expenditure, 2209.4 (502) kcals/day	measured in min/week (median); SB-PAM:3390 CG:3375 LPA- PAM: 630 CG: 720 MPA- PAM: 90 CG: 120 VPA- PAM: 170 CG: 120 MVPA- PAM:320 CG:240(75)	no baseline measurements reported	measured by MSR Electronic GmbH, IG: 4255(1480) activity units/day. CG: 4668(2121) activity units/day.	no baseline measurements reported
STUDY INTERVENTION
behavioral theory	NEAT concept	behavioral change techniques (Mutrie et al 2012)	social comparison, decisional balance, elaboration likelihood, and goal	Not described	social cognitive theory	Not described; done by two exercise physiologists	Transtheoretical Model and Social Cognitive Theory	not described	not described	utilized go4Life materials from NIH- national institute on aging	not described
type of device	GRUVE	ActivPAL	Bluetooth Actiwatch (developed by research team),	Sense Wear Armband (BodyMedia Fit; BodyMedia, Pittsburgh PA	Sense Wear Pro Armband (BODYMEDIA, Pittsburgh, PA)	PAM (model AM 200, PAM BV, the Netherlands)	Sense Wear armband (BodyMedia, Inc., Pittsburgh, PA)	PAM (model AM 101, PAM BV, the Netherlands)	MTx-W sensor (Xsens Technologies, Enschese, The Netherlands)	Fitbit (San Francisco, CA)	Fitbit
device features	based on non-exercise activity thermogenesis, weekly motivational emails from online system	visual feedback from the monitor (8 days)	uniaxial accelerometer unit, data recorded with epoch of 2 minutes, 6 mo. battery life	up to minute feedback on (EE, steps, minutes of MVPA), connect to website to monitor PA, DI and BW. Includes armband and digital display	objective measure EE, EI. Provides feedback on energy balance. Upload/log data into an Internet diary	uni-axial accelerometer, provides single index score as proxy measure of PA, set PAM score goal, software downloaded on computer, visual display of goal (modifiable) by week or month, instructed to login weekly	worn on upper arm and syncs with online website. Connects to watch-like display to give real-time feedback on calories burned, steps taken, minutes of PA.	uni-axial accelerometer, attached to the belt, PAM score displayed continuously on the device display, PAM software downloaded and connects with the PAM COACH website, pt. complete questionnaire on PA barriers, PAM COACH assigns goal based on baseline score, PAM goals and scores displayed graphically, software delivers advice and motivational tips	three dimensional accelerometer, paired with a smartphone that connected wirelessly via Bluetooth. Both sensor and phone were worn on the belt. Used for activity measurements and feedback	worn on the iliac crest on the belt line and measured approximate steps, distance and calories.	an accelerometer that records steps, distance, calories and sleep
days device worn	-	24 hours, 5 days	6457 days (from all participants) had 10 hours of recorded data. 177 days (less than 3% ) did not meet 10 hours of activity data	6.4(1) days week TECH: 17.4 (5.9) h/day SBWL+TECH: 16.2(6.3) h/day p=0.007	sig. correlation between time on body and change in body weight INT-TECH: 63.8(39.8) h/week (r=-0.68, p<0.01) CON-TECH: 71.0(30.7) h/week (r=-0.71, p<0.01)	IG averaged 15 logins during the last months (0.6 times per week)	-	Log-in frequency= 0.9(0.6) per week; 73% (35 out of 48) wore the device "regularly" or "often"	average 17.5(2.2) days, 109% than prescribed; 86% complied with prescription average about 10 hours/day-- 588(101) mins/day Compliance to the sensor was significantly correlated to activity in weeks 1 & 2 (r=0.617, p=0.033 & r=0.621, p=0.031 respectively)	-	-
outcome (s)	Sedentary behavior (SLIPA log), light PA, MP (IPAQ), wellness - all self report	sedentary behavior measured by SBQ, activity measured by ActivPAL (sitting/lying, standing, stepping, steps, sit to stand, SB	PA measured by IPAQ and Actiwatch. Secondary outcomes include: weight, % body fat, bioelectrical impedance scales, height, resting blood pressure, cognitive items	Primary weight. Secondary: height, BMI, waist/hip circumferences, body fat %, cardiorespiratory fitness, PA (Paffenbarger questionnaire), DI, eating behaviors, process measures	Primary: body weight, LTPA (Paffenbarger questionnaire), DI (Block food frequency questionnaire)	Primary: physical activity (IPAQ- self report), work productivity (QQ instrument), sickness absence (operationally obtained) measured at baseline, 6 mo., 12 mo.; Secondary: fitness, body weight, waist circumference, % body fat, blood pressure	primary: body weight, waist circumference. Secondary: BMI, % body fat, and PA (armband)	Primary: Activity divided into sedentary, LPA, MPA, VPA (in METs by the AQuAA) Secondary: determinant of PA, aerobic fitness, body composition	primary: activity level measure in steps by a pedometer (Yamax Digiwalker 200); Secondary: health status, dyspnea, fatigue	primary: LPA & MPA (MSR Electronic GmbH accelerometer). Secondary: wt loss, % body fat, glucose, hemoglobin A1c, insulin, fasting lipid	steps
statistical analysis	paired sample t-test for within group changes,. MANOVA analyze treatment, time, groupxtime. Univariate to identify group difference. SPSS version 21.0	Paired sample t-test for objectively measured outcomes. Wilcoxon Signed Rank test for SBQ outcomes. SPSS version 19	Generalized Estimating Equation Model with log link to identify epoch time within MET ranges. SAS version 9.1.3	ANOVA for descriptive stats. Group difference done with 3x2 mixed ANOVA with post hoc analysis using Bonferroni adjustment. Kruskal-Wallis non parametric test when results weren't normally distributed. ANOVA/independent T-Test/Pearson correlational analysis for difference in process measures	group differences assessed by repeated measures ANOVA. Post hoc analysis using independent t tests with Bonferroni adjustment. Independent t test for difference in process measures. One way ANOVA for group differences for % weight loss. SPSS 13.0	ANCOVA to estimate difference between groups, adjusting for baseline. R software	Linear mixed models controlling for secondary variables. SAS version 9.2	Chi-square test for descriptive stats. Mann-Whitney U test for PA data. Independent sample t-test for other outcome variables. Logistic regression analysis for bivariate outcomes. Standard linear regression to test differences between groups. SPSS 14.0	paired t-test to estimate difference in response time. Independent student t test & ANOVA with Bonferroni post hoc used to test motivational cues. To estimate relationship between variables done by Pearson coefficient and Spearman's rank	two sample t test to compare group differences. Paired t test for within group change. SAS version 9.3	-
ending weight (kg)	-	-	-	SBWL: 84.9(13.1) SBWL+TECH 93.3(17.4) TECH 86.4(13.7	change in weight SBWP: 4.1(2.8) INT-TECH: 3.4(3.4) CON-TECH: 6.2(4)	IG: 72(13) CG: 73(13)	at 4 mo.- standard: 101.23(3.03) GWL: 100.74(2.99) SWA: 98.48(2.97) GWL+SWA: 96.83(2.99) at 9 mo.- standard: 101.32(3.05) GWL: 99.98(3) SWA: 97.6(2.99) GWL+SWA: 93.73(2.99)	crude difference (median) PAM: -0.27	-	change in weight IG: -1.01(2.34) CG: -0.99(1.85)	-
ending BMI	-	-	-	SBWL: 31.7(3.6) SBWL+TECH:31.6(3.4) TECH: 31.3(4.5)	-	-	at 4 mo.- standard: 34.12(0.93) GWL: 34.21(0.92) SWA: 33.83(0.91) GWL+SWA: 33.13(0.91) at 9 mo.- standard: 34.16(0.94) GWL: 33.84(0.92) SWA: 33.56(0.92) GWL+SWA: 32.11(0.92)	-	-	-	-
ending PA	IG SB: 8.6(1.7)hours/day LPA: 6.8(1.7) met-min/week walking: 1625(553.8) MPA: 649(494.9) VPA: 733(829.3) CG SB: 11.2(1.5) LPA: 3.2(1.7) walking: 483(175.9) MPA: 192(221.3) VPA: 193(291.2)	steps: 9686 SB: 50.8(108.8) hours/week	change in outcome variables- IG SB: -5.9(2) LTPA: 4.1 (2.6) overall PA: 12.0(3.1) CG SB: 1.4(2.7) LTPA: -5.5(3.5) overall PA 4(4.1)	SBWL: 991.1(833.6) kcal/week SBWL+TECH: 1484.8 (792.9) TECH: 1489.9(1459.6)	change in LTPA(kcal/week) SBWP 281.6(1205.4) INT-TECH 1286.7(3150.7) CON-TECH 1112.3(1042.3)	at 6 months (MET-min/week) IG: 1995(1673) CG: 2440(1966) at 12 months IG: 2047(1650) CG:2338(1762)	-	reported as median value, at 3 months SB- PAM: 3400 CG: 2470 LPA- PAM: 636 CG: 678 MPA- PAM: 75 CG: 90 VPA- PAM: 80 CG: 113 MVPA-PAM: 197 CG: 281 at 8 months SB- PAM:2925 CG: 3342 LPA-PAM: 500 CG: 593 MPA- PAM: 120 CG: 90 VPA-PAM: 120 CG: 115 MVPA- PAM: 223 CG: 263	IG: 5603 steps/day CG: 4617	change in activity count IG: -217.8(1032.3) CG: -583.6(940.3)	median values IG: 5967 CG: 5341 steps/day
significant outcome(s) change	IG: -1.3 hours/day of sedentary time, LPA +2.5 hours/day, walking +1057, MPA +455, VPA +442, wellness +11%, significant time x treatment interaction	significant change in hours/week: watching TV (27 pre, 21 post), sitting during transportation (6 pre, 4.5 post), total sedentary time (51.8 pre, 50post), total weekend (18 pre, 15post)	IG sig. higher leisure time PA (4.1, -5.5), reduction in sitting time (-5.9, 1.4), increase in MVPA (difference of 19.7 min/day), increases in intention/expectation, fitness satisfaction, well being, internal control, external control, percent body fat change (-2.18%, -0.17%)	significant time effect and group x time interaction with body weight. Significant weight loss, hip/waist circumference, % body fat, PA, dietary intake in all groups, not sig. between groups. Cardiorespiratory fitness was significantly improved in all groups with significantly lower improvements in SBWL. Eating behaviors significantly improved in SBWL+TECH compared to SBWL	significant weight loss in all groups. Significant weight loss in CON-TECH (6.2) compared to INT-TEC H (4.1 SBWP, 3.4 INT-TECH). Significant change in LTPA and DI but not statistically different between groups	No significant results on primary outcomes. Significant differences found for body weight (-0.5kg, favor control group) and fat % (-0.6%, favor control group)	significant change in weight in all intervention groups at 9 mo. GWL+SWA (-6.59kg) had significant weight loss compared to standard (-0.9) at 9 mo. Significant reduction in waist circumference in all groups (standard mediated by two extremely motivated participants). Significant reductions in body fat	No significant results on PA levels. Subgroup analysis showed among higher-education LPA lowered at the end of the intervention (β=-349). No significant results in secondary outcome. Subgroup analysis found intervention effect by BMI on determinants of PA, and decrease in body weight among low-educated (β=-1.6)	health status significantly improved in intervention group (-0.3 change), reduced motivation significantly improved in control group, compliance with the activity sensor was significantly correlated wo the change in activity level in weeks 1-2	No significant difference between groups at 6 months. Significant within group negative change in activity (control only), weight, Get Up and Go (IG only), Hbg A1c (CG only), cholesterol (IG only)	no statistical analysis reported.
Retention rate	1	0.92	1	76.5%-- significantly different by group: 55% SBWL, 100% SBWL-TECH, 77% TECH)	87.7%-- were younger and minorities	At 12 months, questionnaire completion 66% IG & 68% CG; physical test completion 67% IG & 72% CG	62% at 9 mo. (52% in standard, 70% in intervention)	78.43% (75% IG 82% CG)	0.882	0.98	0.952
Assessor blinded?	No	No	No	No	No	No	Yes	No	no	no	not described
KHALYIS COMPONENTS
self-monitoring?	yes	yes	yes	yes	yes	yes	yes	yes	yes	yes	yes
feedback characteristics	yes- goal progression visualization	yes- visual feedback	yes-on planned activity, visual graphs of activity progress	yes- through website on many activity behaviors and on display worn	Yes-via website	yes-PAM computer software given by proxy score. Progress displayed graphically for the week or month	yes- from display and from website	yes, by display on PAM. PAM website given proxy score	yes- via text messages from the system	yes- Fitbit display	yes-Fitbit system
social support?	no	no	yes- message board	yes- group sessions	no	no	yes- group counseling	no	yes- group physical therapy	no	no
structured behavioral program?	no	yes	yes	yes	yes	no	yes	no	no	yes	no
individually tailored program?	yes	yes	yes	yes	yes	yes	yes	yes	yes	yes	yes
LIMITATIONS	small sample size, self report measures, no details on exclusion criteria, short intervention period, no comparable behavioral standard	no control group, used convenient samples, short duration intervention, small sample size, not generalizable	not enough data on perceptions of monitoring system,	not powered to detect differences between groups, low representation of minorities and males, could not distinguish which components of technology were the most effective to promote change	limited generalization, limited to impact in 3 mo., independent effect of technology based system on weight loss not determined, not powered to find 2.1 kg difference in body weight	physically active population, majority of healthy weight participants, no obesity subgroup, device may not be engaging enough, possible selection bias from self selection and exclusion criteria, self report measures of PA and work productivity	large attrition rate, mostly female and highly educated (not generalizable), short intervention, research funded by BodyMedia	self reported measures, relatively active population (69% in the intervention group meeting PA guidelines), high number were acquainted with PA recommendations, only generalizable to workplace, devices weren't sensitive to cycling and weightlifting	small sample size	convenient sample, not generalizable for entire elderly community, difficult to see display	the presence of the device (regardless of blinded to feedback) may have prompted to increase steps, relatively active population
FUTURE WORK	determine if 1. EAM increase wellness 2. if increase in PA/decrease in SB mediates change in wellness 3. affects of EAM on wellness overtime	casual pathways should be determined, need larger/diverse sample	employ triaxial accelerometers, activity of water sports, evaluate how absolute continuous accelerometer measurement relate to government PA recommendations	examine how preference for technology affects compliance and retention, consider assessing group preference at baseline, examine use for longer period, examine each technology component	consider larger sample, examine independent effects of technology based system	Not described	evaluate if weight loss is maintained or continued over long term	not described	evaluate methods to stimulate activity in COPD population, establish minimal clinical important different in daily activity	use population-based sample, recruited subjects who are deficient in LPA, investigate how to help older people increase their activity	not described
QUALITY SCORE	MEDIUM	MEDIUM	MEDIUM	MEDIUM	MEDIUM	MEDIUM	HIGH	LOW	MEDIUM	MEDIUM	LOW**
